# Supplementary material
Source: Royal Society of Chemistry journal article supplement (doi:10.1039/d5nj04431f)
Supplement: d5nj04431f1.pdf [file d5nj04431f1.pdf]

## Supporting Information

### **One-Step Microwave Synthesis of Boron-Doped BiOBr/rGO Nanohybrids with Enhanced Visible-Light Photocatalytic and Antibacterial Performance**

Shanavas Yoosuf,<sup>a</sup> Muhammed Muhammed Safeer Naduvil Kovilakath,<sup>b</sup> Neena S. John,<sup>b</sup> and  
Shalina Begum Tharayil<sup>\*a</sup>

<sup>a</sup>Postgraduate and Research Department of chemistry, Farook College (Autonomous), Affiliated  
to University of Calicut, 673632, Kerala, India

<sup>b</sup>Centre for Nano and Soft Matter Sciences (CeNS), Shivanapura, Bengaluru 562162, India.

E-mail: shalinat@gmail.com

#### **Corresponding Author**

**Shalina Begum Tharayil** - *Postgraduate and Research Department of chemistry, Farook College  
(Autonomous), Calicut 673632, Kerala, India. (Affiliated to University of Calicut)*

*E-mail: shalinat@gmail.com*

| <b>Table of Contents</b> |                                                                                                                                                                                                             |
|--------------------------|-------------------------------------------------------------------------------------------------------------------------------------------------------------------------------------------------------------|
| <b>Table S1</b>          | Inoculums details.                                                                                                                                                                                          |
| <b>Fig. S1</b>           | Elemental composition analysis of B-BiOBr/rGO composite material, as revealed by Energy-Dispersive Spectroscopy (EDS).                                                                                      |
| <b>Fig. S2</b>           | Elemental composition analysis of BiOBr, as revealed by Energy-Dispersive Spectroscopy (EDS).                                                                                                               |
| <b>Fig. S3</b>           | Elemental composition analysis of BiOBr/rGO composite, as revealed by Energy-Dispersive Spectroscopy (EDS).                                                                                                 |
| <b>Fig. S4</b>           | Elemental composition analysis of B-BiOBr composite, as revealed by Energy-Dispersive Spectroscopy (EDS).                                                                                                   |
| <b>Fig. S5</b>           | Spatial distribution of elements within the B-BiOBr/rGO composite, as visualized through elemental mapping analysis.                                                                                        |
| <b>Fig. S6</b>           | Spatial distribution of elements within the BiOBr, as visualized through elemental mapping analysis.                                                                                                        |
| <b>Fig. S7</b>           | Spatial distribution of elements within the BiOBr/rGO composite, as visualized through elemental mapping analysis.                                                                                          |
| <b>Fig. S8</b>           | Spatial distribution of elements within the B-BiOBr composite, as visualized through elemental mapping analysis.                                                                                            |
| <b>Fig. S9</b>           | (a) N <sub>2</sub> adsorption-desorption isotherms and (b) pore size distribution profiles of B-BiOBr/rGO, B-BiOBr, BiOBr/rGO, and BiOBr, illustrating their surface properties and pore structures.        |
| <b>Table S2</b>          | Summary of BET analysis results for modified photocatalysts, including specific surface area, pore size distribution, and total pore volume.                                                                |
| <b>Fig. S10</b>          | Effect of pH on the photocatalytic degradation of (a) MB and (b) RhB using B-BiOBr/rGO as photocatalyst (c) The point of zero charge (pH <sub>PZC</sub> ) of B-BiOBr/rGO determined by the pH drift method. |

|                 |                                                                                                                                                                                                                                           |
|-----------------|-------------------------------------------------------------------------------------------------------------------------------------------------------------------------------------------------------------------------------------------|
| <b>Fig. S11</b> | Impact of catalyst loading on the photocatalytic degradation of (a) MB and (b) RhB using B-BiOBr/rGO photocatalyst.                                                                                                                       |
| <b>Fig. S12</b> | Effect of initial dye concentration on the photocatalytic degradation of (a) MB and (b) RhB using B-BiOBr/rGO as the photocatalyst.                                                                                                       |
| <b>Fig. S13</b> | Degradation efficiency and mineralization of (a) MB and (b) RhB by B-BiOBr/rGO under optimized conditions.                                                                                                                                |
| <b>Fig. S14</b> | XRD spectrum of B-BiOBr/rGO after photocatalytic activity studies.                                                                                                                                                                        |
| <b>Fig. S15</b> | Effect of scavengers on the photocatalytic degradation of (a) MB and (b) RhB using B-BiOBr/rGO as the catalyst.                                                                                                                           |
| <b>Fig. S16</b> | LC-MS spectrum of methylene blue before light irradiation, showing the characteristic molecular ion peak of the parent dye.                                                                                                               |
| <b>Fig. S17</b> | LC-MS spectrum of methylene blue after photocatalysis, illustrating the degradation of the parent dye into characteristic fragment ions.                                                                                                  |
| <b>Fig. S18</b> | LC-MS spectrum of rhodamine B before light irradiation, showing the characteristic molecular ion peak of the parent dye.                                                                                                                  |
| <b>Fig. S19</b> | LC-MS spectrum of rhodamine B after photocatalysis, illustrating the degradation of the parent dye into characteristic fragment ions.                                                                                                     |
| <b>Fig. S20</b> | Impact of varying concentrations of (a) BiOBr, (b) BiOBr/rGO, (c) B-BiOBr, and (d) B-BiOBr/rGO on the growth of <i>Bacillus subtilis</i> , a Gram-positive bacterium, at two different doses: 500 µg (T1) and 1000 µg (T2) per disc.      |
| <b>Fig. S21</b> | Impact of varying concentrations of (a) BiOBr, (b) BiOBr/rGO, (c) B-BiOBr, and (d) B-BiOBr/rGO on the growth of <i>Staphylococcus aureus</i> , a Gram-positive bacterium, at two different doses: 500 µg (T1) and 1000 µg (T2) per disc.  |
| <b>Fig. S22</b> | Impact of varying concentrations of (a) BiOBr, (b) BiOBr/rGO, (c) B-BiOBr, and (d) B-BiOBr/rGO on the growth of <i>Pseudomonas Aeruginosa</i> , a Gram-negative bacterium, at two different doses: 500 µg (T1) and 1000 µg (T2) per disc. |

|                 |                                                                                                                                                                                                                             |
|-----------------|-----------------------------------------------------------------------------------------------------------------------------------------------------------------------------------------------------------------------------|
| <b>Fig. S23</b> | Impact of varying concentrations of (a) BiOBr, (b) BiOBr/rGO, (c) B-BiOBr, and (d) B-BiOBr/rGO on the growth of Escherichia coli, a Gram-negative bacterium, at two different doses: 500 µg (T1) and 1000 µg (T2) per disc. |
| <b>Fig. S24</b> | Impact of varying concentrations of (a) BiOBr, (b) BiOBr/rGO, (c) B-BiOBr, and (d) B-BiOBr/rGO on the growth of Vibrio cholerae, a Gram-negative bacterium, at two different doses: 500 µg (T1) and 1000 µg (T2) per disc.  |
| <b>Table S3</b> | Inhibition Zone Measurements for BiOBr, BiOBr/rGO, B-BiOBr, and B-BiOBr/rGO Against Different Bacterial Strains                                                                                                             |
| <b>Table S4</b> | ICP-MS analysis of B-BiOBr/rGO after antibacterial studies, showing Bi ion concentration to evaluate material stability.                                                                                                    |
| <b>Table S5</b> | ICP-MS analysis of B-BiOBr/rGO after photocatalytic degradation of methylene blue, demonstrating Bi ion release and structural stability of the composite.                                                                  |
| <b>Table S6</b> | ICP-MS analysis of B-BiOBr/rGO after photocatalytic degradation of rhodamine B, demonstrating Bi ion release and structural stability of the composite.                                                                     |

| Name of Microorganism         | MTCC No. | Incubation conditions |
|-------------------------------|----------|-----------------------|
| <i>Escherichia coli</i>       | 443      | 37 °C for 24 hours    |
| <i>Vibrio cholerae</i>        | 3906     |                       |
| <i>Staphylococcus aureus</i>  | 87       |                       |
| <i>Pseudomonas aeruginosa</i> | 741      |                       |
| <i>Bacillus subtilis</i>      | 2413     |                       |

**Table S1** Inoculums details

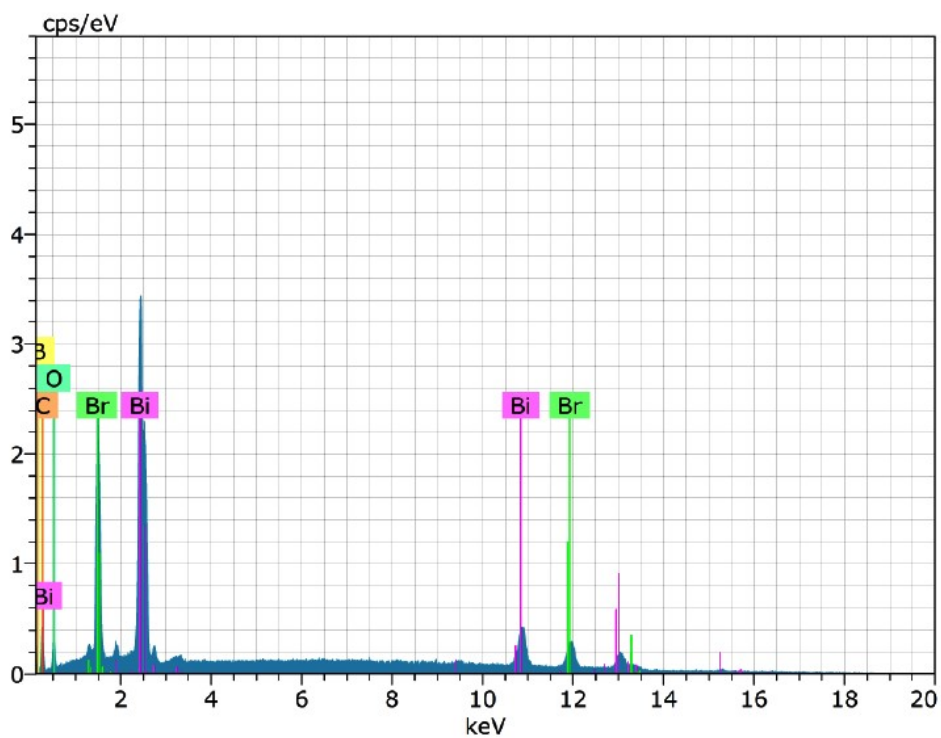

**Fig. S1** Elemental composition analysis of B-BiOBr/rGO composite material, as revealed by Energy-Dispersive Spectroscopy (EDS).

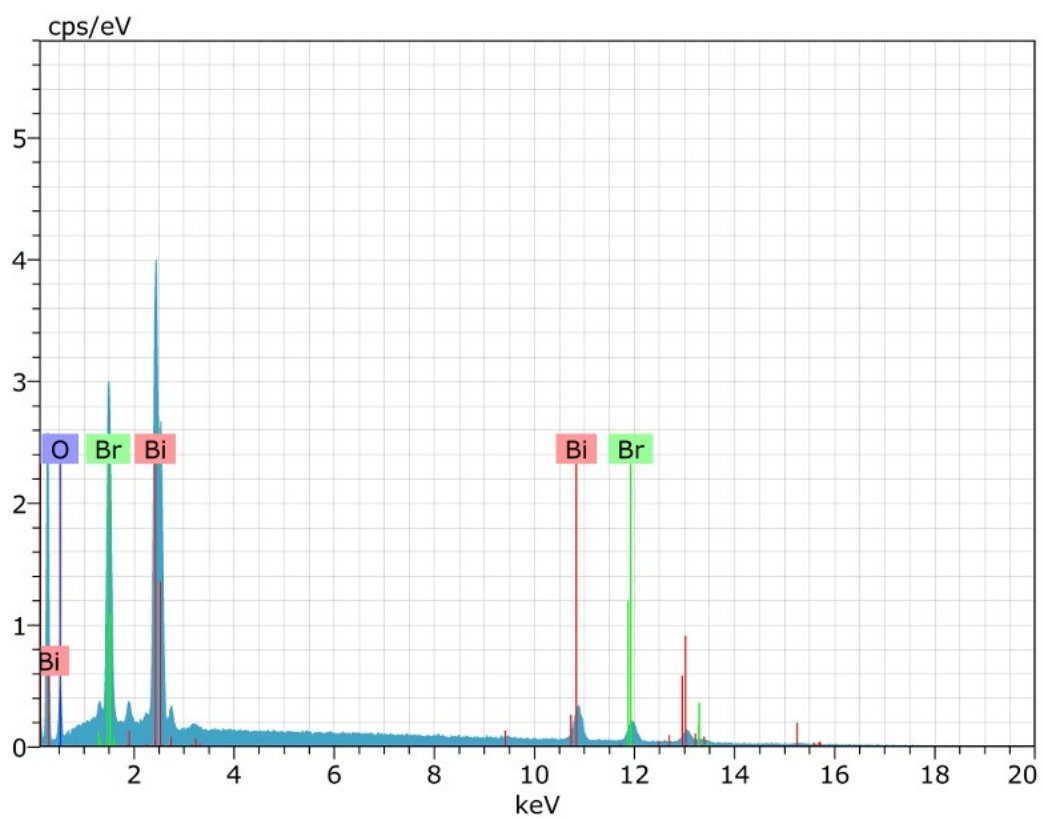

**Fig. S2** Elemental composition analysis of BiOBr, as revealed by Energy-Dispersive Spectroscopy (EDS).

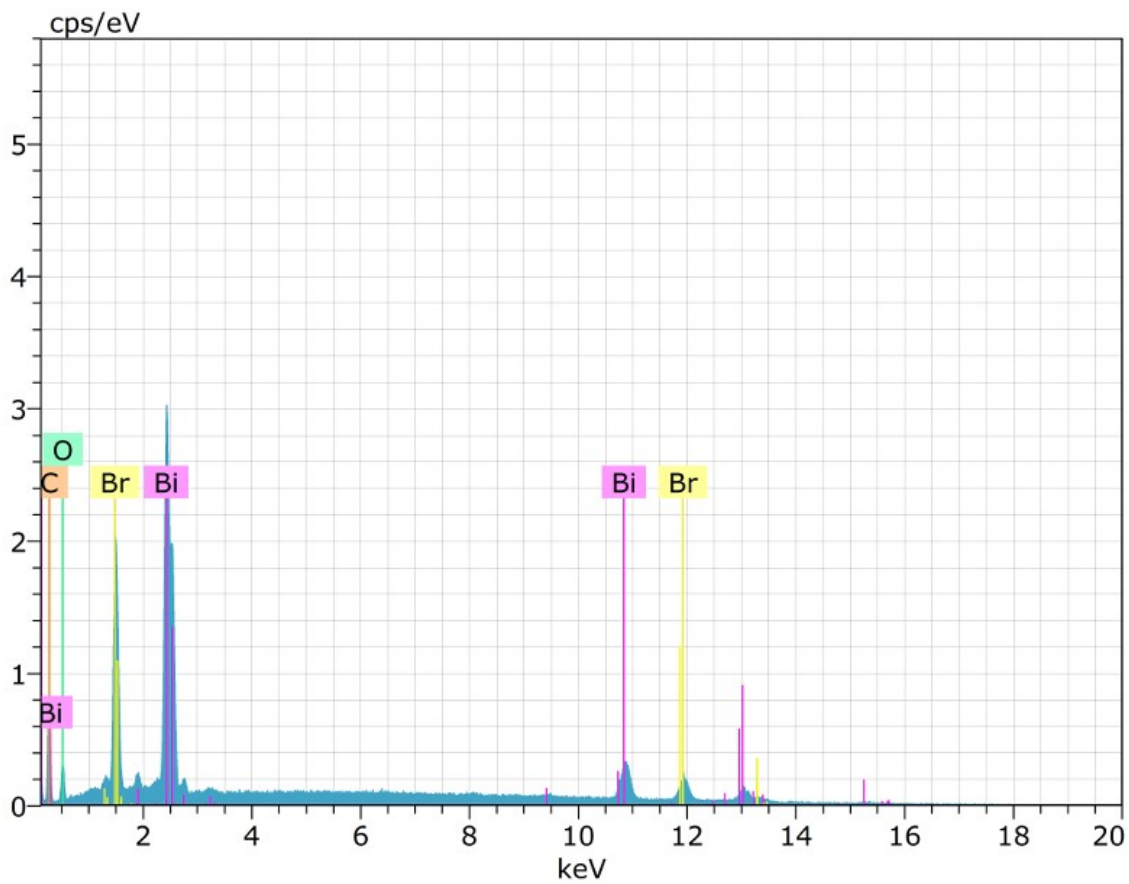

**Fig. S3** Elemental composition analysis of BiOBr/rGO composite, as revealed by Energy-Dispersive Spectroscopy (EDS).

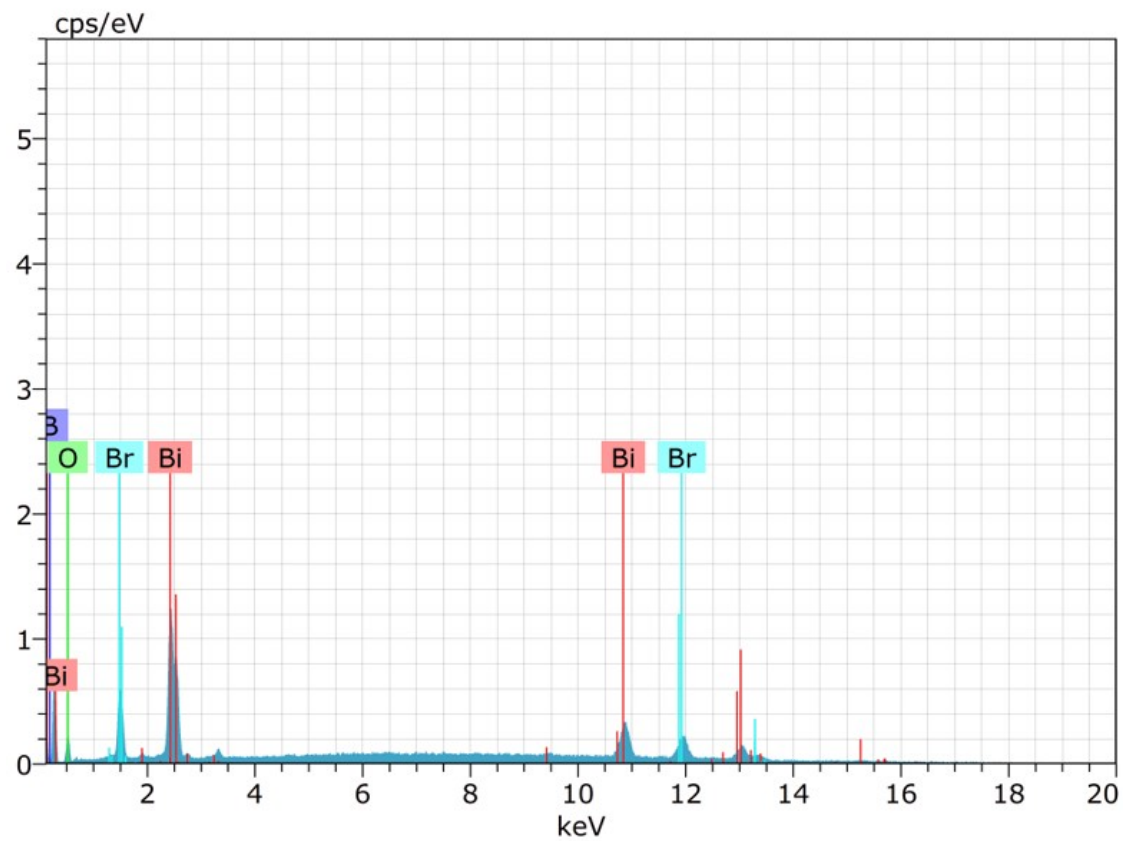

**Fig. S4** Elemental composition analysis of B-BiOBr, as revealed by Energy-Dispersive Spectroscopy (EDS).

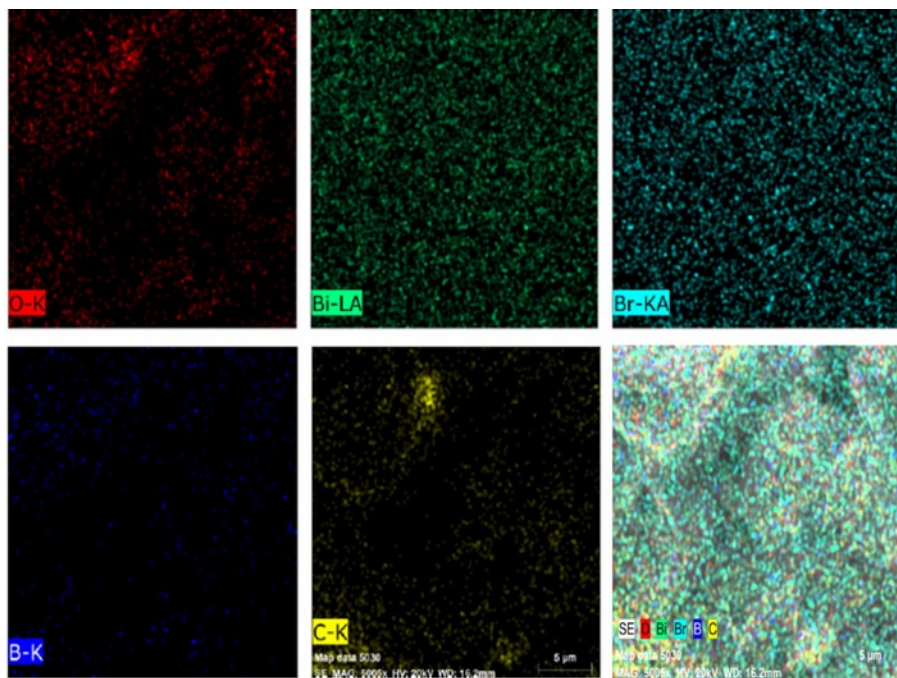

**Fig. S5** Spatial distribution of elements within the B-BiOBr/rGO composite, as visualized through elemental mapping analysis.

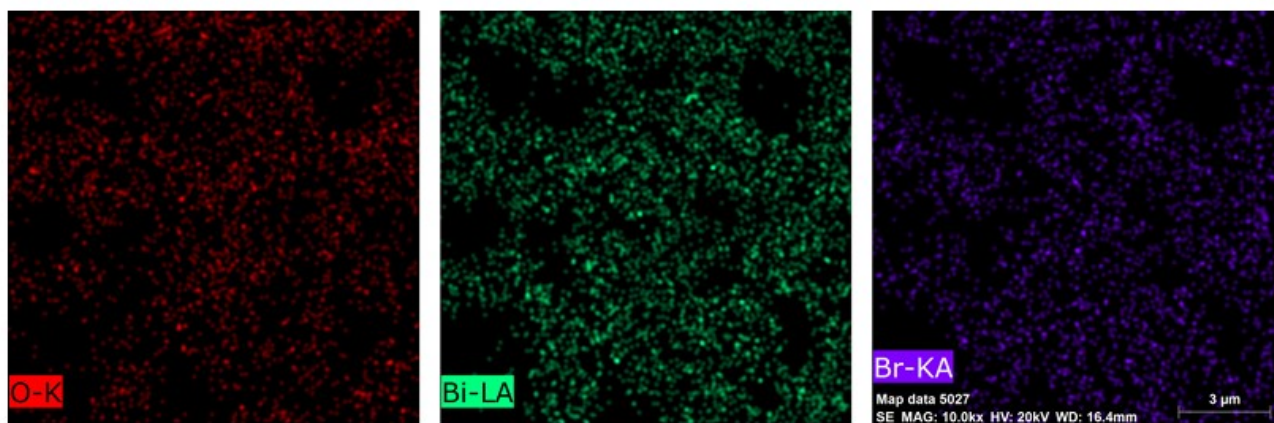

**Fig. S6** Spatial distribution of elements within the BiOBr, as visualized through elemental mapping analysis.

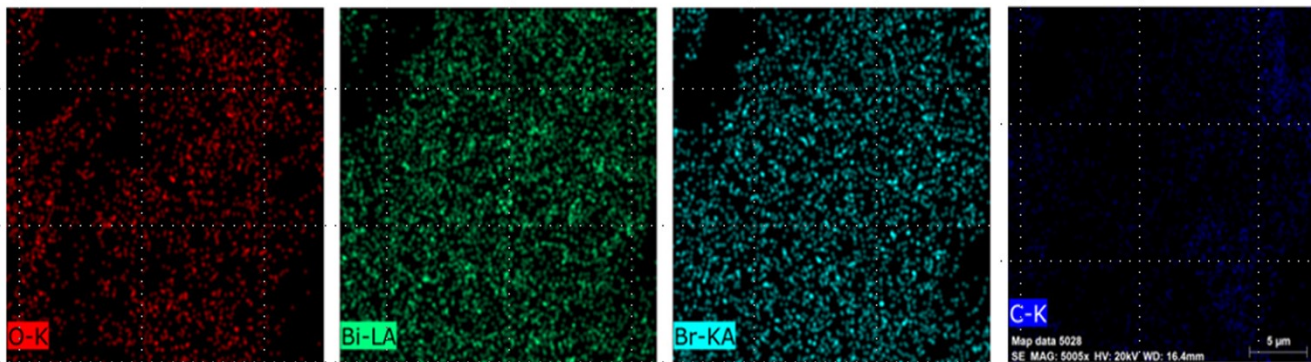

**Fig. S7** Spatial distribution of elements within the BiOBr/rGO composite, as visualized through elemental mapping analysis.

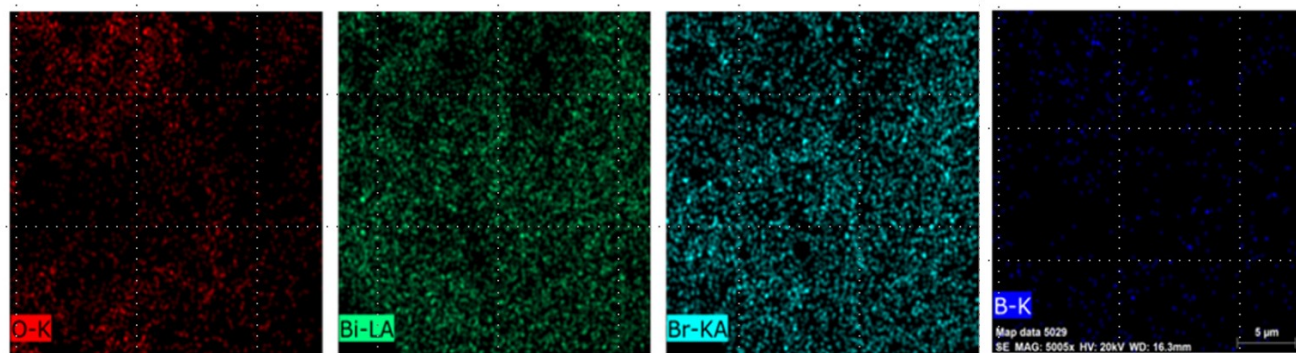

**Fig. S8** Spatial distribution of elements within the B-BiOBr composite, as visualized through elemental mapping analysis.

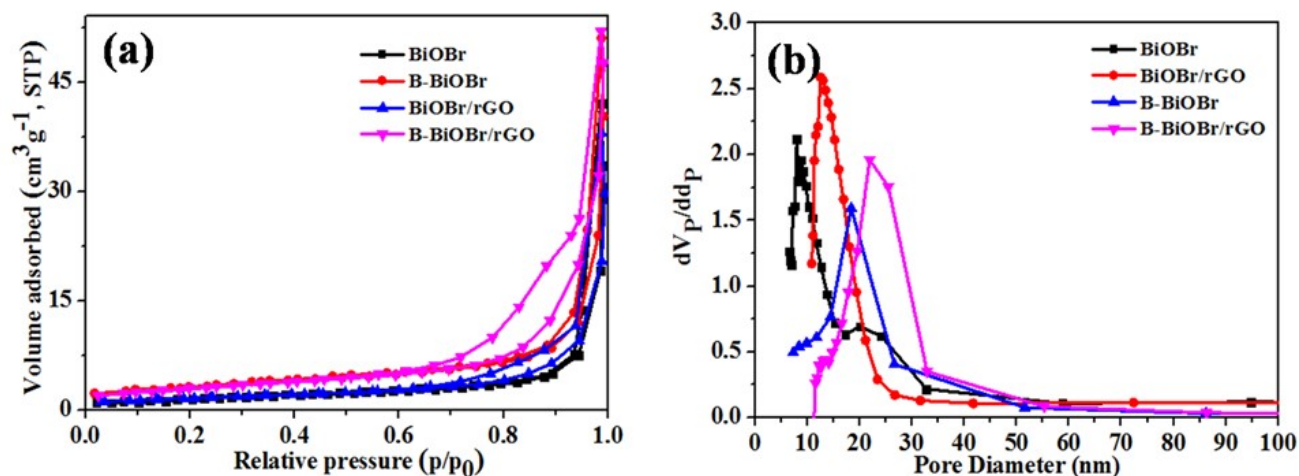

**Fig. S9** (a)  $N_2$  adsorption-desorption isotherms and (b) pore size distribution profiles of B-BiOBr/rGO, B-BiOBr, BiOBr/rGO, and BiOBr, illustrating their surface properties and pore structures.

| Catalysts   | BET Surface Area<br>( $m^2/g$ ) | BJH Pore Size Distribution<br>(nm) | Total Pore Volume<br>( $cm^3/g$ ) |
|-------------|---------------------------------|------------------------------------|-----------------------------------|
| BiOBr       | 7.64                            | 12.29                              | 0.125                             |
| BiOBr/rGO   | 11.55                           | 13.01                              | 0.196                             |
| B-BiOBr     | 13.42                           | 18.42                              | 0.247                             |
| B-BiOBr/rGO | 19.78                           | 21.95                              | 0.321                             |

**Table S2** Summary of BET analysis results for modified photocatalysts, including specific surface area, pore size distribution, and total pore volume.

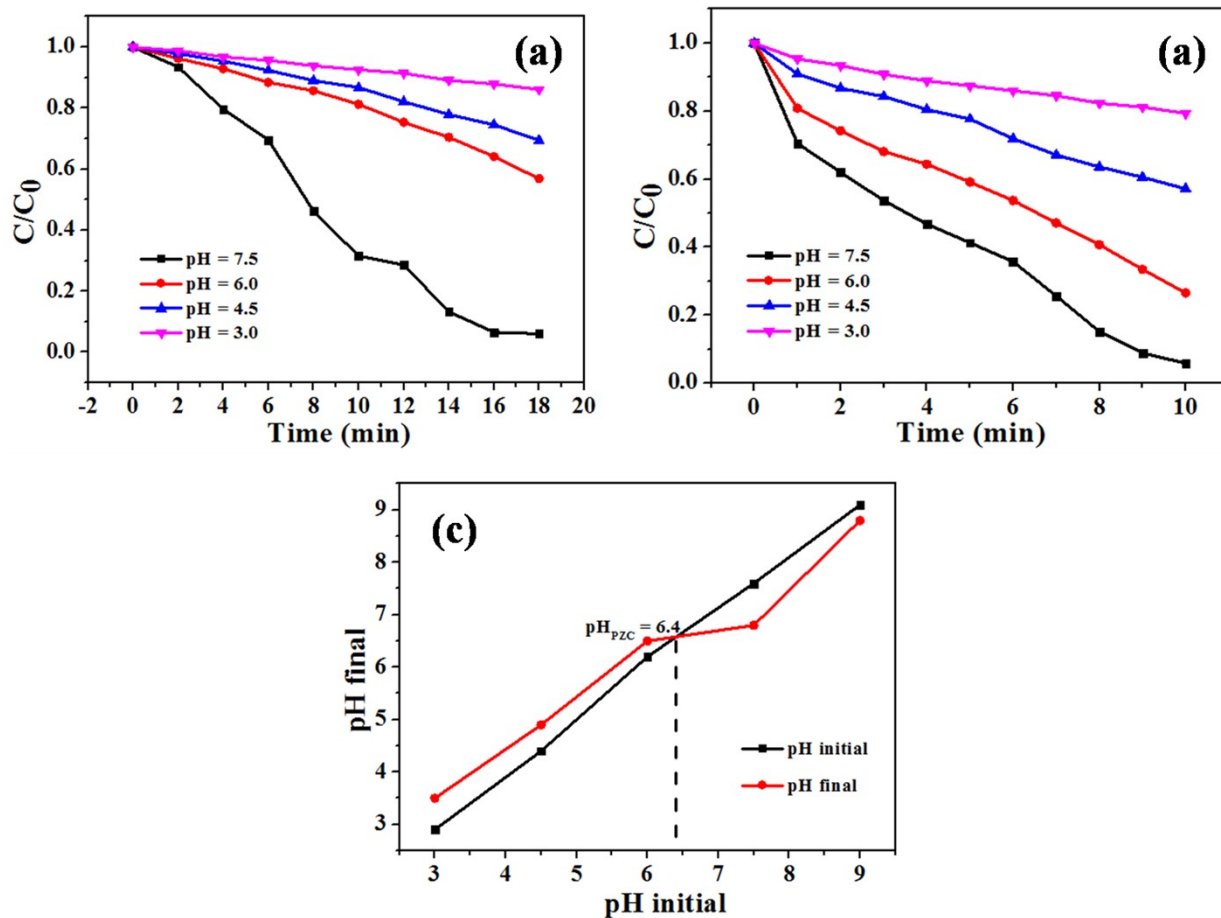

**Fig. S10** Effect of pH on the photocatalytic degradation of (a) MB and (b) RhB using B-BiOBr/rGO as photocatalyst (c) The point of zero charge ( $pH_{PZC}$ ) of B-BiOBr/rGO determined by the pH drift method.

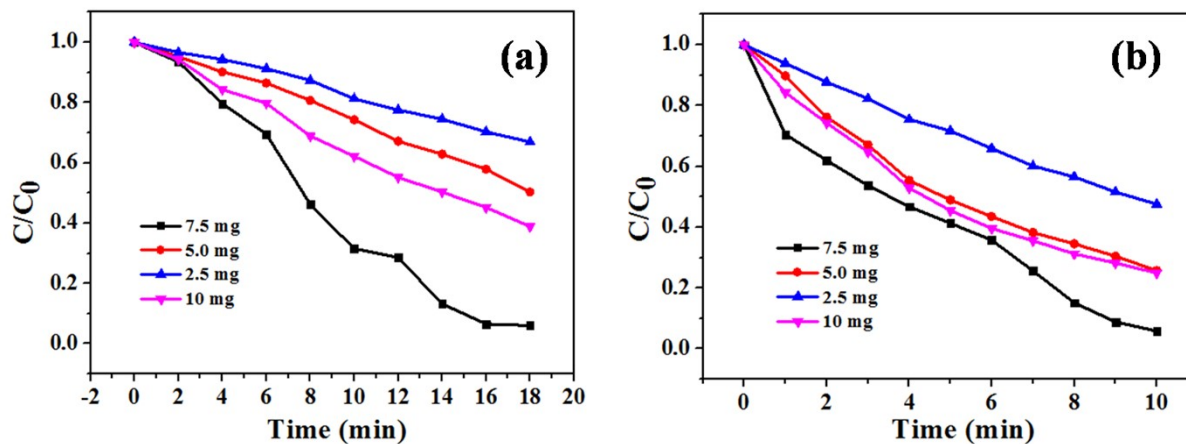

**Fig. S11** Impact of catalyst loading on the photocatalytic degradation of (a) MB and (b) RhB using B-BiOBr/rGO photocatalyst.

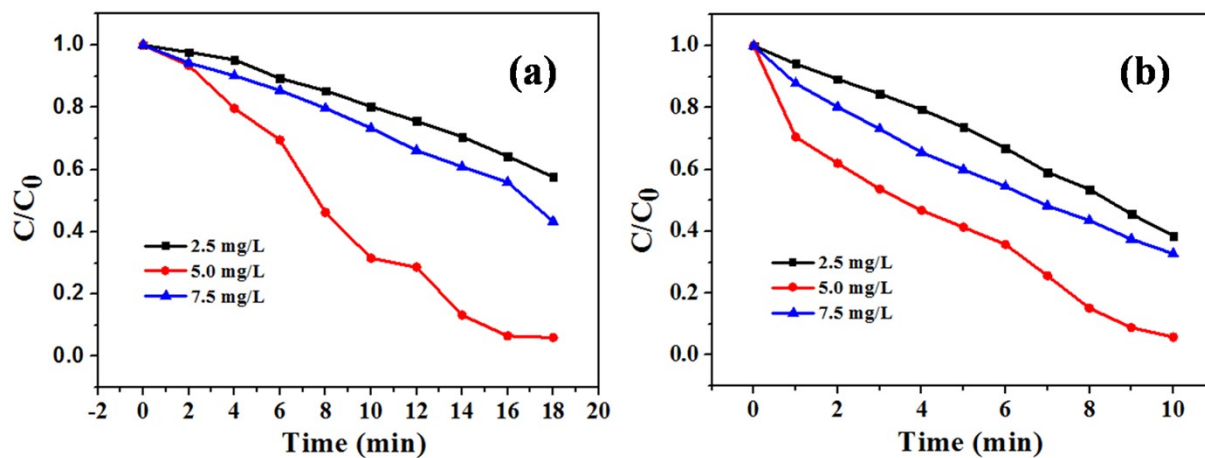

**Fig. S12** Effect of initial dye concentration on the photocatalytic degradation of (a) MB and (b) RhB using B-BiOBr/rGO as the photocatalyst.

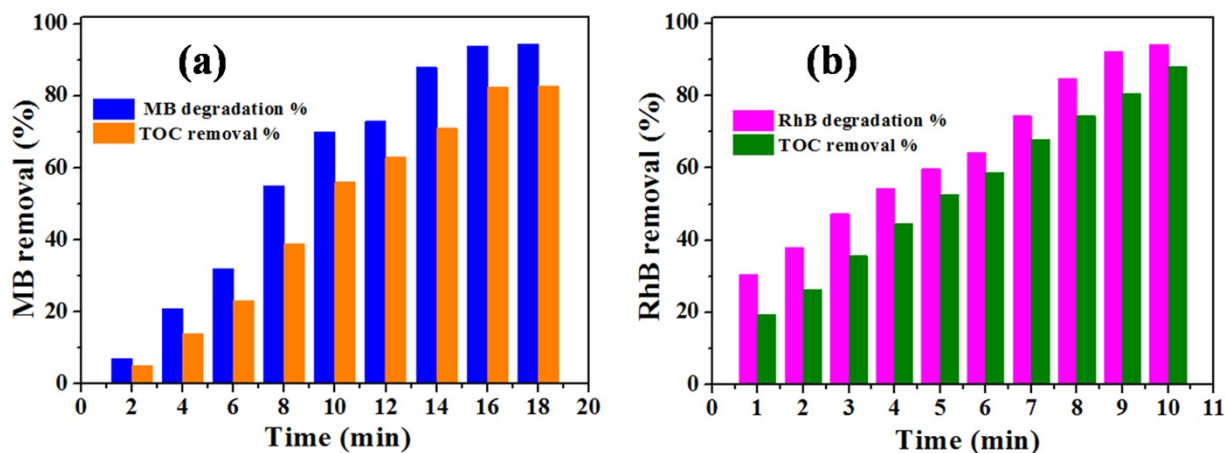

**Fig. S13** Degradation efficiency and mineralization of (a) MB and (b) RhB by B-BiOBr/rGO under optimized conditions.

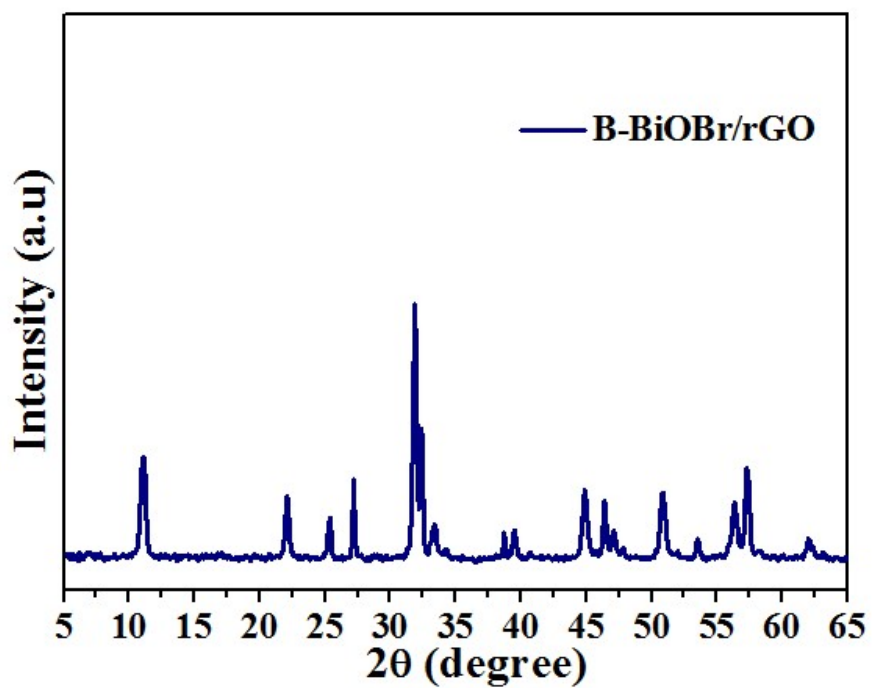

Fig. S14 XRD spectrum of B-BiOBr/rGO after photocatalytic activity studies.

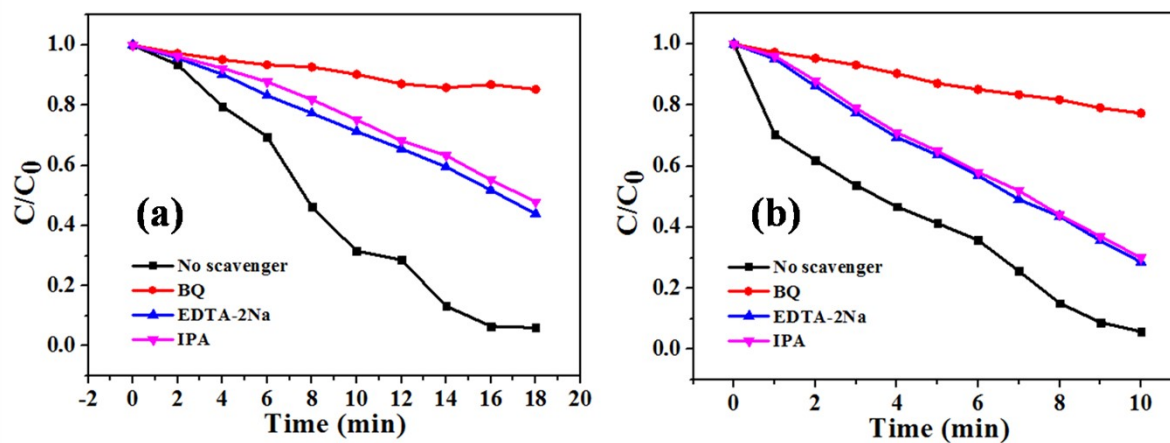

Fig. S15 Effect of scavengers on the photocatalytic degradation of (a) MB and (b) RhB using B-BiOBr/rGO as the catalyst.

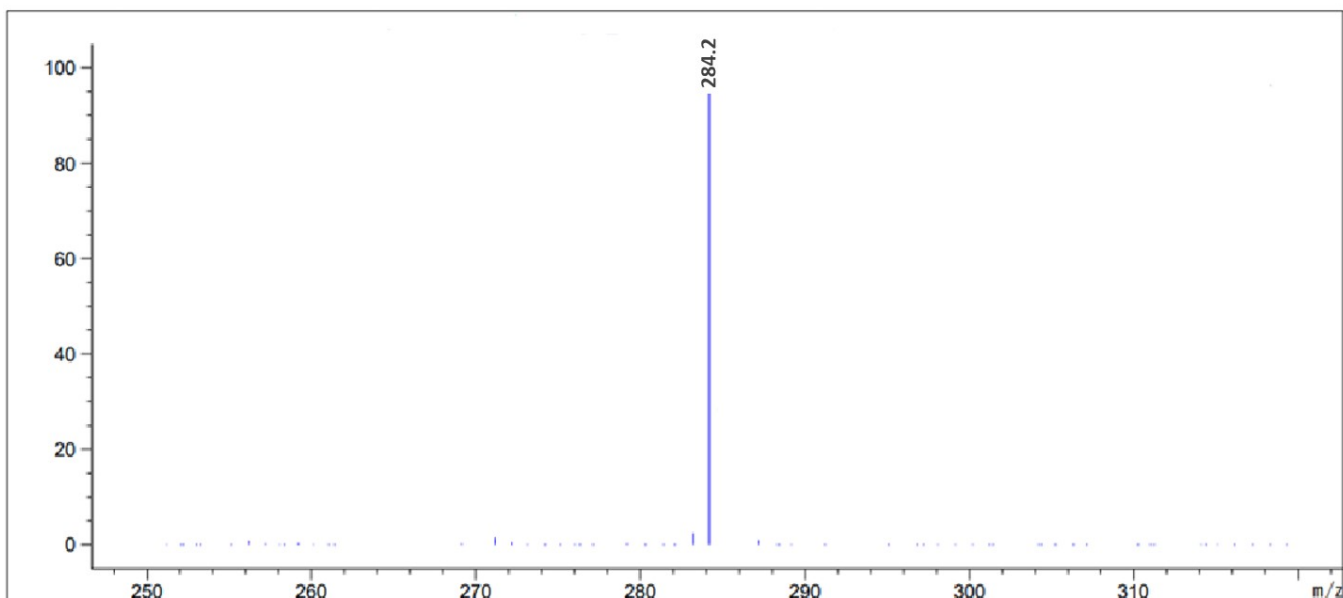

**Fig. S16** LC-MS spectrum of methylene blue before light irradiation, showing the characteristic molecular ion peak of the parent dye.

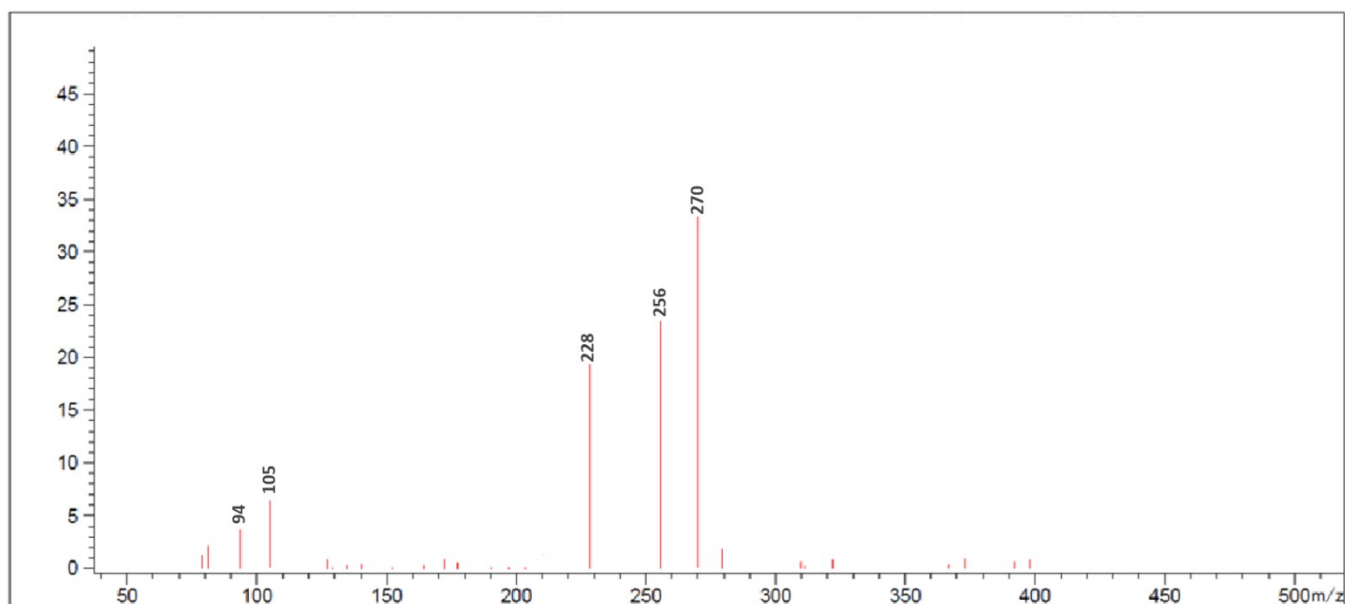

**Fig. S17** LC-MS spectrum of methylene blue after photocatalysis, illustrating the degradation of the parent dye into characteristic fragment ions.

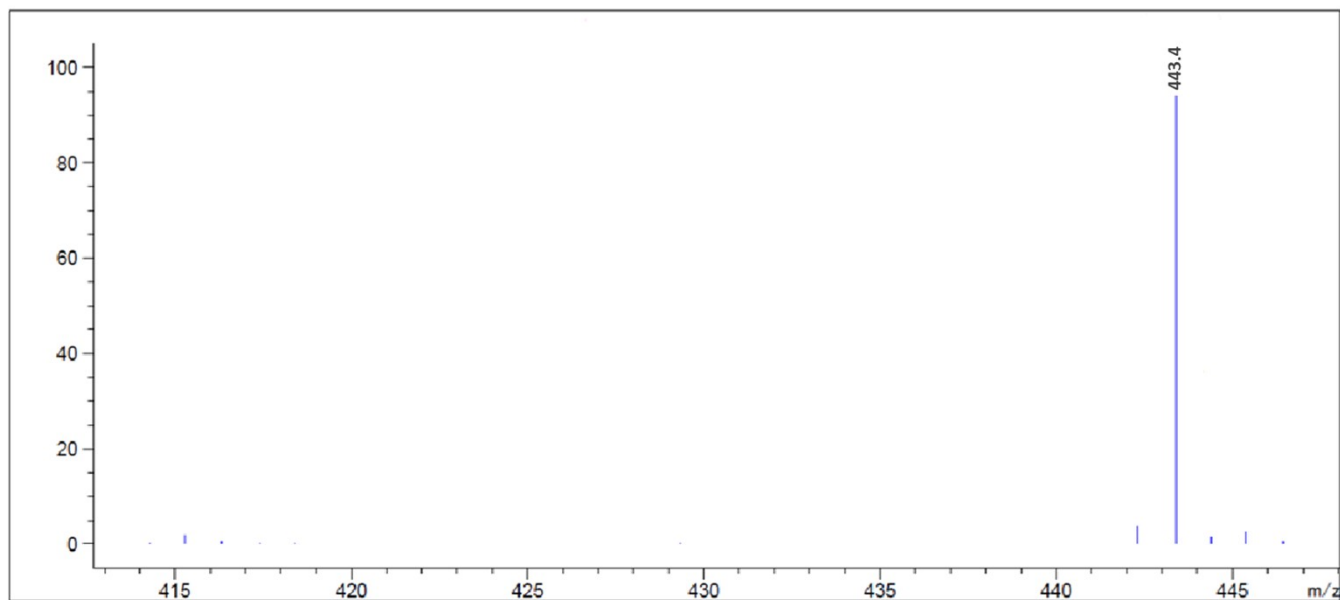

**Fig. S18** LC–MS spectrum of rhodamine B before light irradiation, showing the characteristic molecular ion peak of the parent dye.

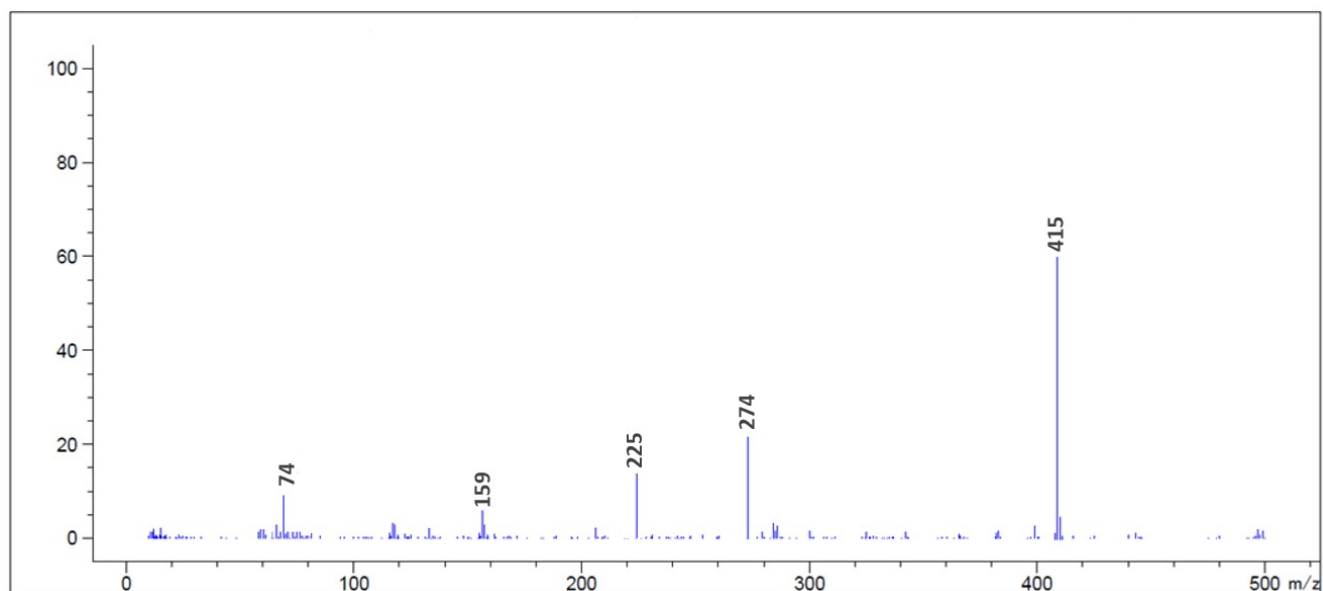

**Fig. S19** LC–MS spectrum of rhodamine B after photocatalysis, illustrating the degradation of the parent dye into characteristic fragment ions.

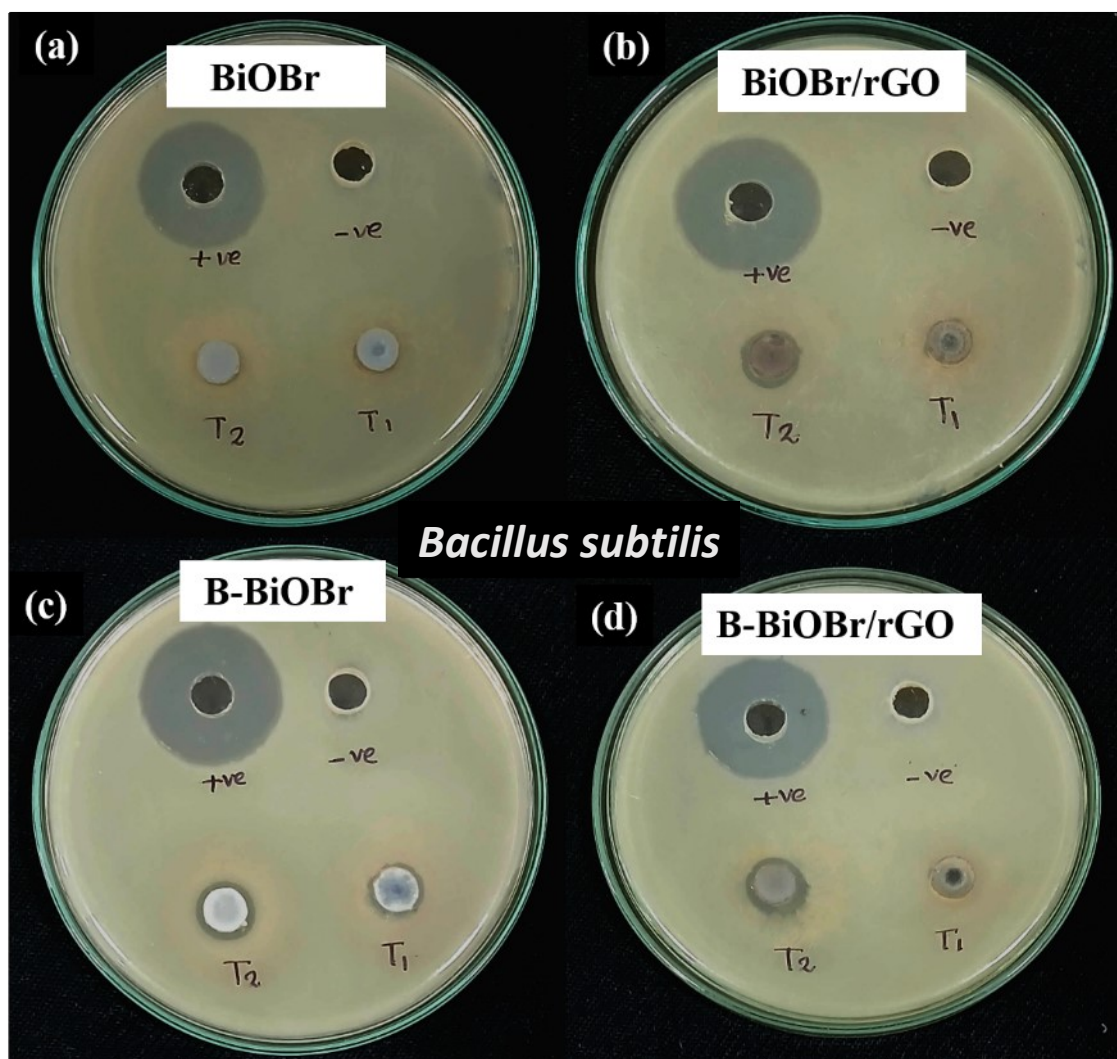

**Fig. S20** Impact of varying concentrations of (a) BiOBr, (b) BiOBr/rGO, (c) B-BiOBr, and (d) B-BiOBr/rGO on the growth of *Bacillus subtilis*, a Gram-positive bacterium, at two different doses: 500  $\mu\text{g}$  (T<sub>1</sub>) and 1000  $\mu\text{g}$  (T<sub>2</sub>) per disc.

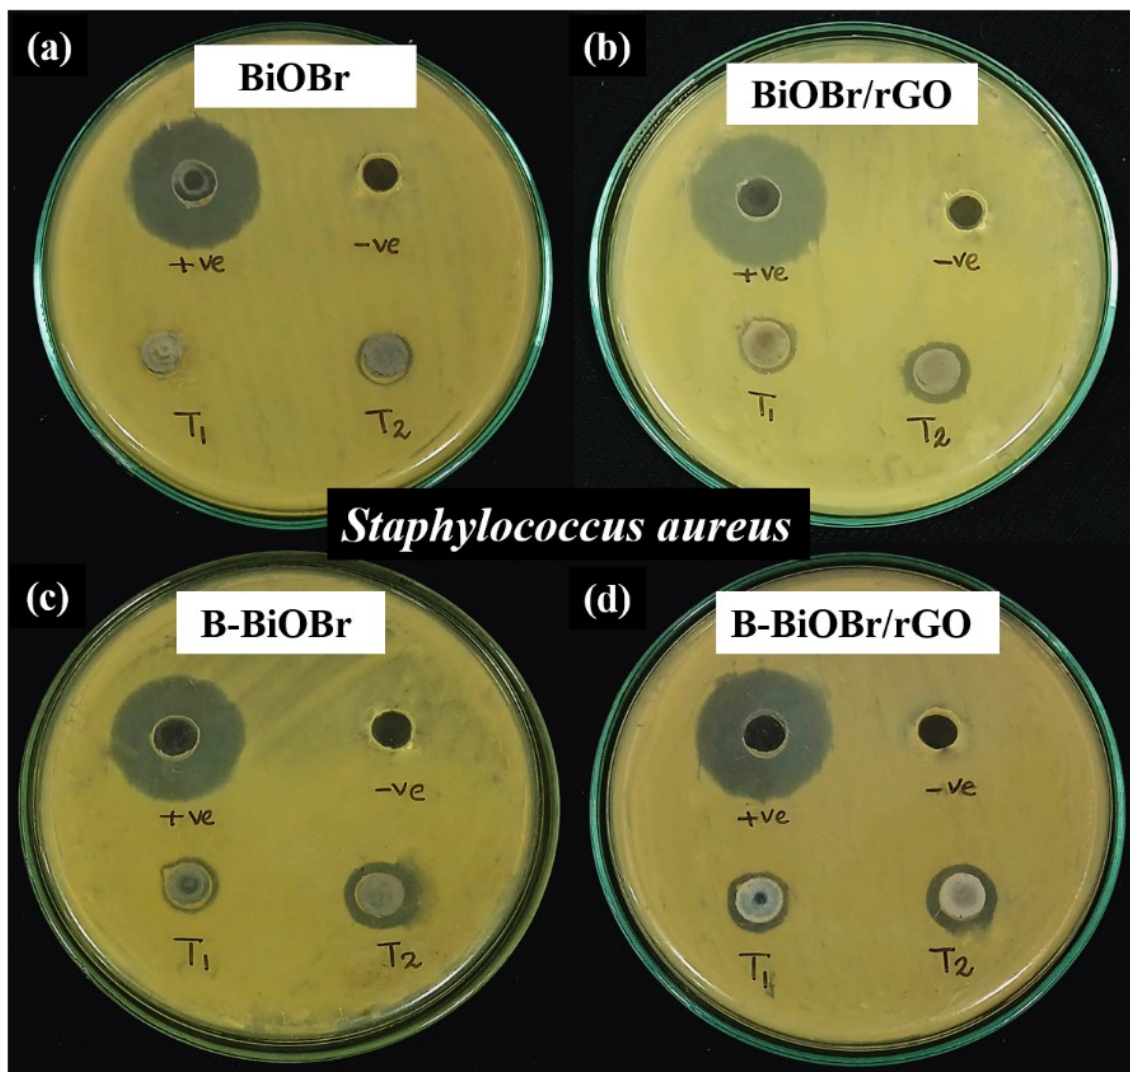

**Fig. S21** Impact of varying concentrations of (a) BiOBr, (b) BiOBr/rGO, (c) B-BiOBr, and (d) B-BiOBr/rGO on the growth of *Staphylococcus aureus*, a Gram-positive bacterium, at two different doses: 500  $\mu\text{g}$  (T<sub>1</sub>) and 1000  $\mu\text{g}$  (T<sub>2</sub>) per disc.

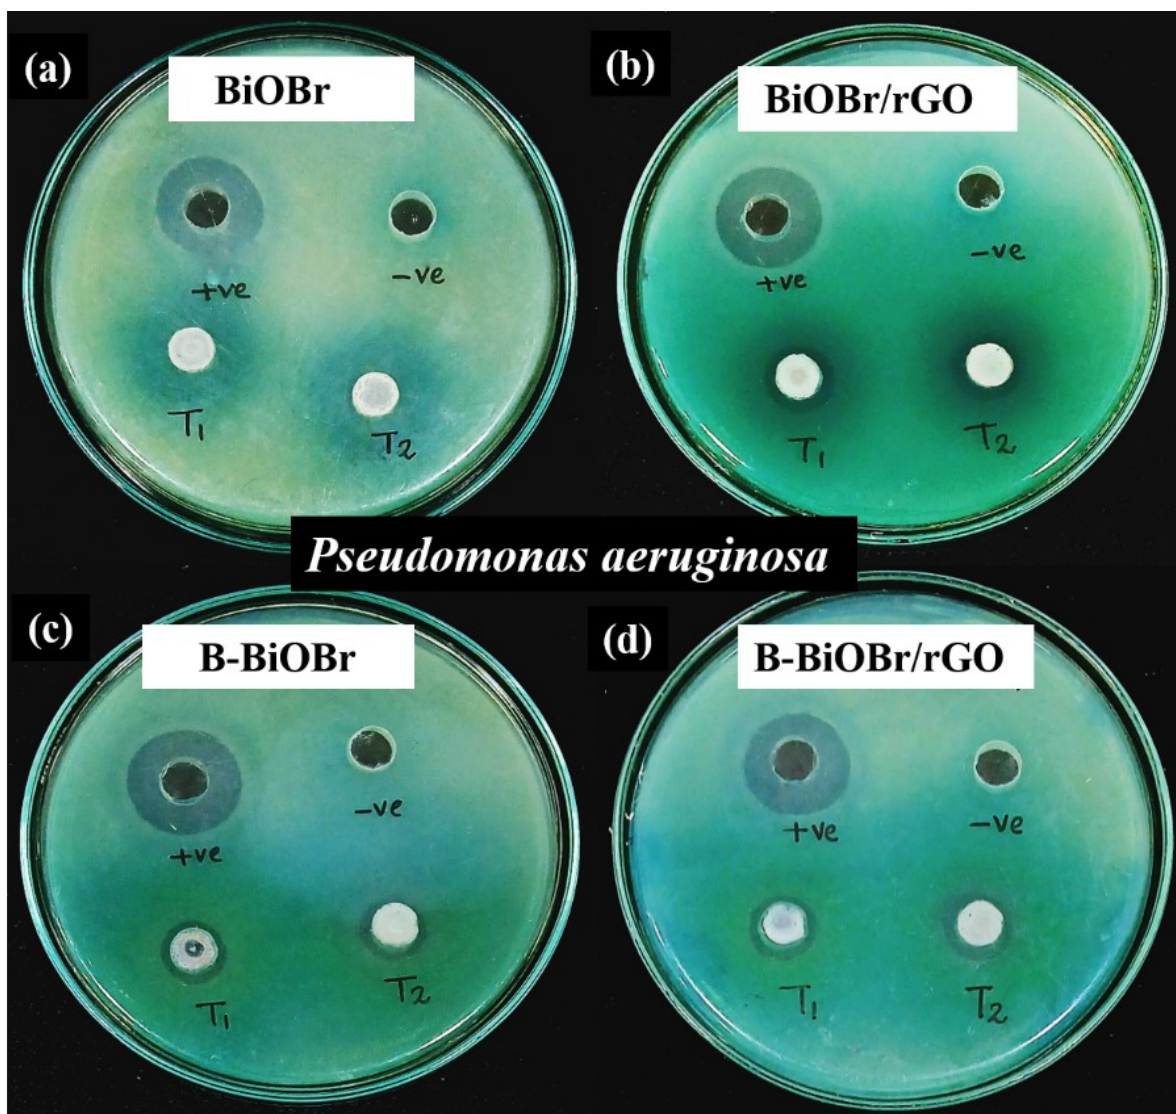

**Fig. S22** Impact of varying concentrations of (a) BiOBr, (b) BiOBr/rGO, (c) B-BiOBr, and (d) B-BiOBr/rGO on the growth of *Pseudomonas Aeruginosa*, a Gram-negative bacterium, at two different doses: 500  $\mu\text{g}$  (T<sub>1</sub>) and 1000  $\mu\text{g}$  (T<sub>2</sub>) per disc.

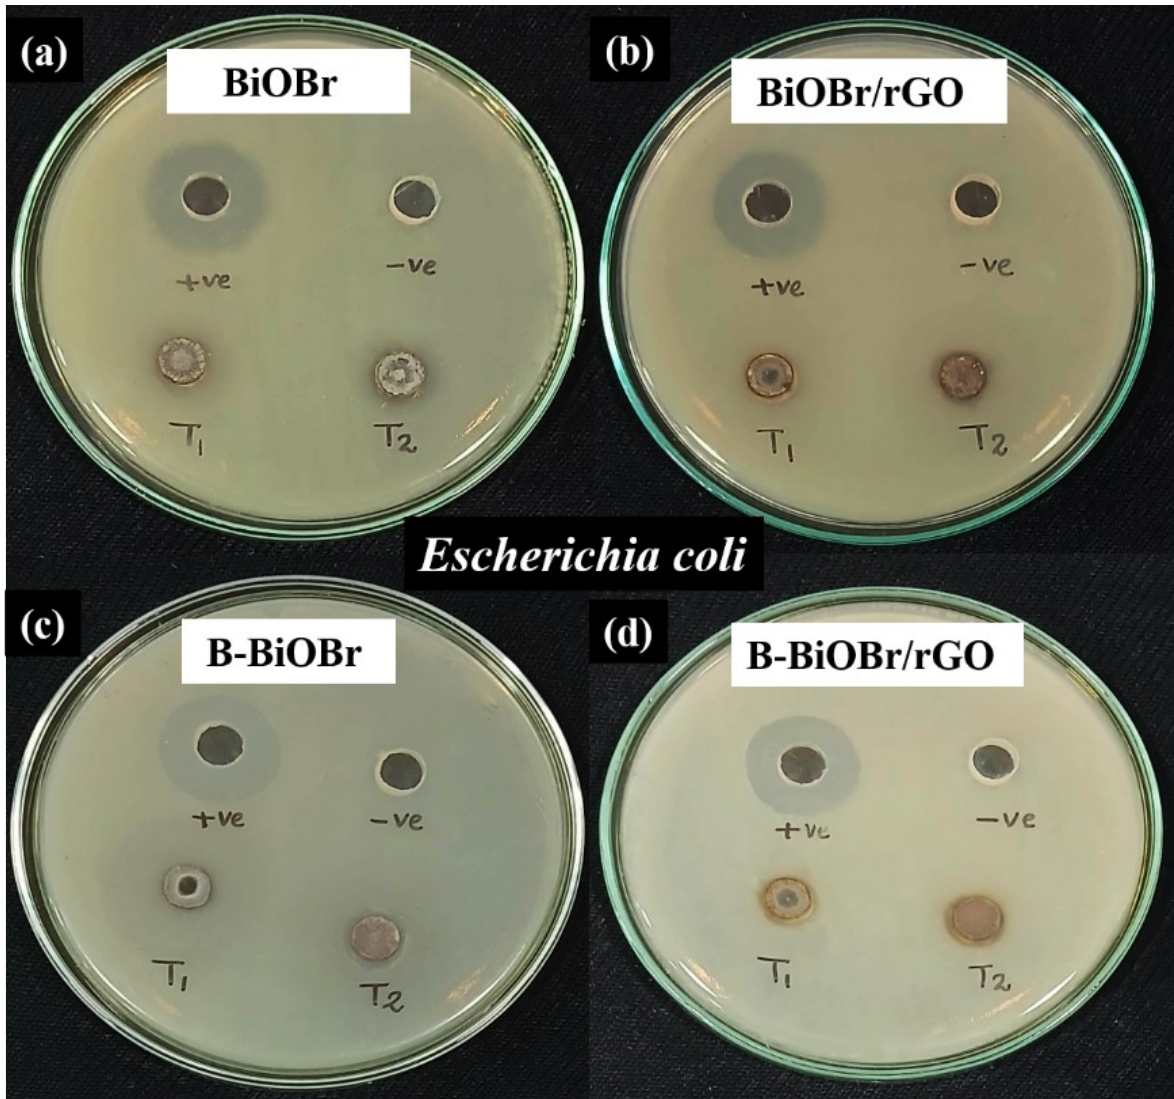

**Fig. S23** Impact of varying concentrations of (a) BiOBr, (b) BiOBr/rGO, (c) B-BiOBr, and (d) B-BiOBr/rGO on the growth of *Escherichia coli*, a Gram-negative bacterium, at two different doses: 500  $\mu\text{g}$  (T<sub>1</sub>) and 1000  $\mu\text{g}$  (T<sub>2</sub>) per disc.

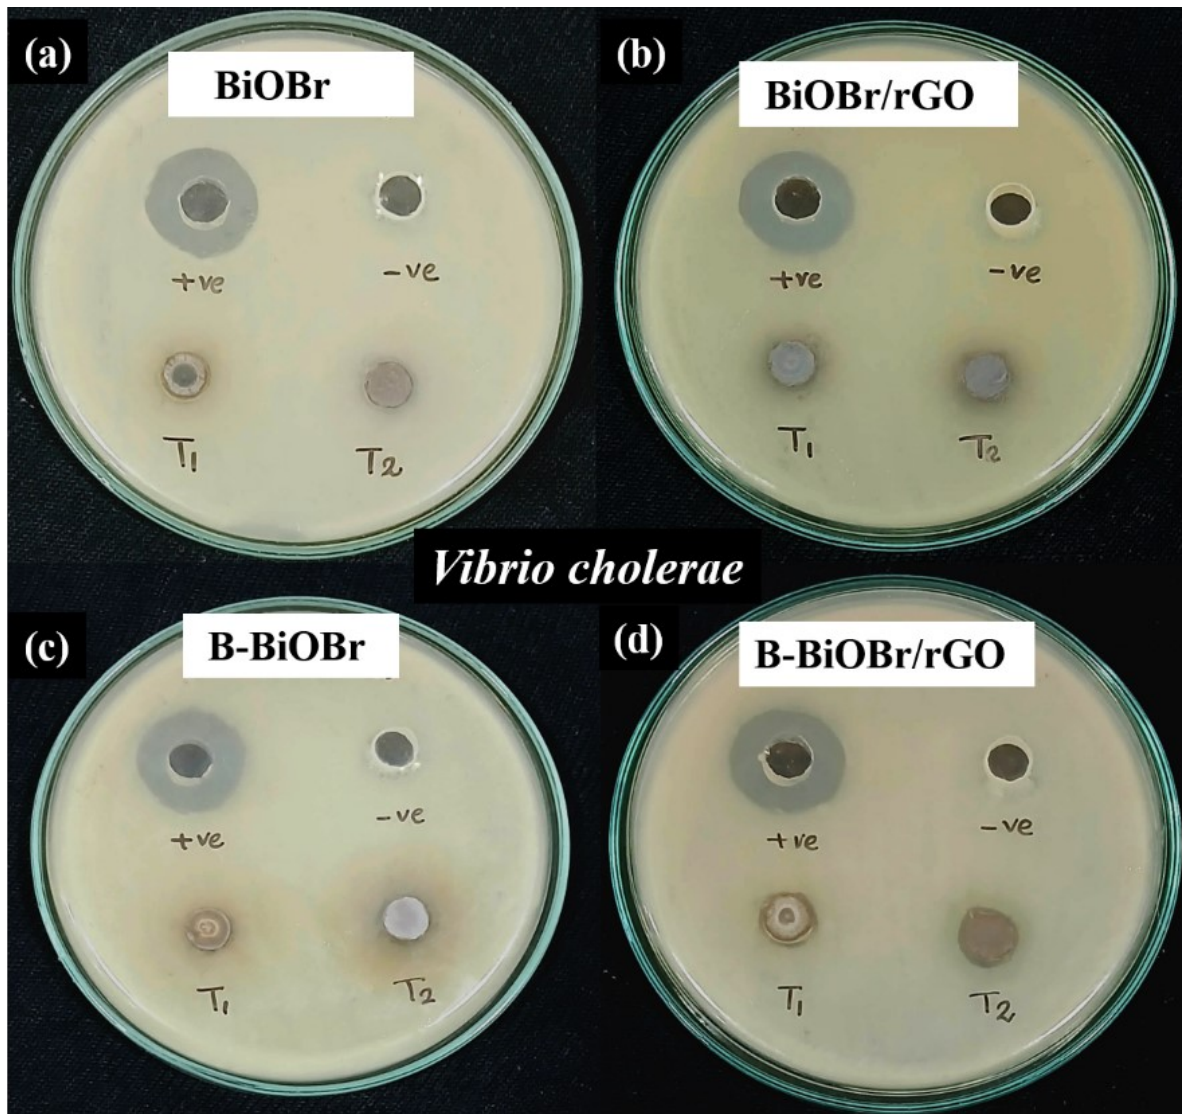

**Fig. S24** Impact of varying concentrations of (a) BiOBr, (b) BiOBr/rGO, (c) B-BiOBr, and (d) B-BiOBr/rGO on the growth of *Vibrio cholerae*, a Gram-negative bacterium, at two different doses: 500  $\mu\text{g}$  (T<sub>1</sub>) and 1000  $\mu\text{g}$  (T<sub>2</sub>) per disc.

| Name of Microorganism         | Sample      | Zone of Inhibition (ZOI in mm) |                  |                        |                         |
|-------------------------------|-------------|--------------------------------|------------------|------------------------|-------------------------|
|                               |             | Positive control               | Negative control | T <sub>1</sub> (500µg) | T <sub>2</sub> (1000µg) |
| <i>Pseudomonas aeruginosa</i> | BiOBr       | 19                             | 0                | 0                      | 0                       |
|                               | BiOBr/rGO   | 19                             | 0                | 11                     | 13                      |
|                               | B-BiOBr     | 19                             | 0                | 12                     | 14                      |
|                               | B-BiOBr/rGO | 19                             | 0                | 12                     | 15                      |
| <i>Vibrio cholerae</i>        | BiOBr       | 20                             | 0                | 0                      | 0                       |
|                               | BiOBr/rGO   | 20                             | 0                | 0                      | 12                      |
|                               | B-BiOBr     | 20                             | 0                | 0                      | 13                      |
|                               | B-BiOBr/rGO | 20                             | 0                | 10                     | 14                      |
| <i>Escherichia coli</i>       | BiOBr       | 21                             | 0                | 0                      | 9                       |
|                               | BiOBr/rGO   | 21                             | 0                | 0                      | 10                      |
|                               | B-BiOBr     | 21                             | 0                | 0                      | 10                      |
|                               | B-BiOBr/rGO | 21                             | 0                | 9                      | 11                      |
| <i>Bacillus subtilis</i>      | BiOBr       | 25                             | 0                | 0                      | 0                       |
|                               | BiOBr/rGO   | 25                             | 0                | 0                      | 11                      |
|                               | B-BiOBr     | 25                             | 0                | 0                      | 11                      |
|                               | B-BiOBr/rGO | 25                             | 0                | 10                     | 12                      |
| <i>Staphylococcus aureus</i>  | BiOBr       | 25                             | 0                | 0                      | 9                       |
|                               | BiOBr/rGO   | 25                             | 0                | 10                     | 11                      |
|                               | B-BiOBr     | 25                             | 0                | 10                     | 11                      |
|                               | B-BiOBr/rGO | 25                             | 0                | 11                     | 12                      |

**Table S3** Inhibition Zone Measurements for BiOBr, BiOBr/rGO, B-BiOBr, and B-BiOBr/rGO Against Different Bacterial Strains

| Element | Mass | Conc. | Units |
|---------|------|-------|-------|
| Bi      | 209  | 0.231 | ppb   |

**Table S4** ICP–MS analysis of B–BiOBr/rGO after antibacterial studies, showing Bi ion concentration to evaluate material stability.

| Element | Mass | Conc. | Units |
|---------|------|-------|-------|
| Bi      | 209  | 0.159 | ppb   |

**Table S5** ICP–MS analysis of B–BiOBr/rGO after photocatalytic degradation of methylene blue, demonstrating Bi ion release and structural stability of the composite.

| Element | Mass | Conc. | Units |
|---------|------|-------|-------|
| Bi      | 209  | 0.198 | ppb   |

**Table S6** ICP–MS analysis of B–BiOBr/rGO after photocatalytic degradation of rhodamine B, demonstrating Bi ion release and structural stability of the composite.
